# Supplementary material
Source: PubMed Central journal article supplement (PMC4134362)
Supplement: NIHMS608893-supplement-02.pdf [file NIHMS608893-supplement-02.pdf]

**Table S1. Mean Fold-Change of Expression Levels of 84 Genes Quantified Using RT<sup>2</sup> Profiler™ Apoptosis PCR Array, Related to Figure 4**

Each row corresponds to a different gene. Mean fold-change represent values obtained from n=4 biological replicates/group (MxTKO versus MxCntrl).

| Gene Symbol | Mean Fold Change MxTKO/MxCntrl | Standard Deviation |
|-------------|--------------------------------|--------------------|
| Akt1        | <u>1.002425</u>                | 0.104170086        |
| Apaf1       | <u>1.0798</u>                  | 0.420855177        |
| Api5        | <u>0.6384</u>                  | 0.089244524        |
| Atf5        | <u>0.9321</u>                  | 0.161371946        |
| Bad         | <u>0.877225</u>                | 0.290208127        |
| Bag1        | <u>0.836475</u>                | 0.251702666        |
| Bag3        | <u>0.78365</u>                 | 0.187213014        |
| Bak1        | <u>0.700525</u>                | 0.1746968          |
| Bax         | <u>0.7196</u>                  | 0.136636983        |
| Bcl10       | <u>2.295175</u>                | 1.382199568        |
| Bcl2        | <u>1.672275</u>                | 0.43132969         |
| Bcl2l1      | <u>2.119675</u>                | 0.582835236        |
| Bcl2l10     | <u>3.47735</u>                 | 2.528825566        |
| Bcl2l2      | <u>0.797775</u>                | 0.19327477         |
| Bid         | <u>0.943925</u>                | 0.351898049        |
| Naip1       | <u>1.281825</u>                | 0.753674752        |
| Birc2       | <u>1.2755</u>                  | 0.247039622        |
| Birc3       | <u>2.1974</u>                  | 0.568496003        |
| Xiap        | <u>1.188125</u>                | 0.301379233        |
| Birc5       | <u>0.6318</u>                  | 0.56915584         |
| Bnip2       | <u>0.99895</u>                 | 0.302267617        |
| Bnip3       | <u>1.748375</u>                | 0.489511907        |
| Bnip3l      | <u>1.383525</u>                | 0.548556398        |
| Bok         | <u>2.2643</u>                  | 1.044107784        |
| Card10      | <u>1.9537</u>                  | 0.610694187        |
| Nod1        | <u>1.3569</u>                  | 0.340414732        |
| Card6       | <u>3.73925</u>                 | 0.947310587        |
| Casp1       | <u>0.888025</u>                | 0.180147903        |
| Casp12      | <u>1.256666667</u>             | 0.940262702        |
| Casp14      | <u>1.171175</u>                | 0.219192693        |
| Casp2       | <u>1.058275</u>                | 0.506007862        |
| Casp3       | <u>1.446075</u>                | 0.532946477        |
| Casp4       | <u>0.719066667</u>             | 0.146430788        |
| Casp6       | <u>1.564325</u>                | 0.641774097        |
| Casp7       | <u>1.16865</u>                 | 0.48793465         |
| Casp8       | <u>1.025125</u>                | 0.278321275        |
| Casp9       | <u>1.042175</u>                | 0.456053815        |
| Cflar       | <u>1.483675</u>                | 0.26879925         |
| Cidea       | <u>1.142975</u>                | 0.165256125        |
| Cideb       | <u>0.951025</u>                | 0.182413327        |
| Cradd       | <u>1.39205</u>                 | 0.839907285        |
| Dad1        | <u>0.8857</u>                  | 0.469494223        |
| Dapk1       | <u>3.620825</u>                | 0.993166649        |
| Dffa        | <u>1.1438</u>                  | 0.679945678        |
| Dffb        | <u>0.8782</u>                  | 0.244301545        |
| Tsc22d3     | <u>2.405</u>                   | 0.650778822        |
| Fadd        | <u>0.925</u>                   | 0.6743075          |

|           |                 |             |
|-----------|-----------------|-------------|
| Fas       | <u>3.135475</u> | 1.2935307   |
| Fasl      | <u>2.275425</u> | 0.787019837 |
| Hells     | <u>0.5291</u>   | 0.407944671 |
| Il10      | <u>1.1141</u>   | 0.921736608 |
| Lhx4      | <u>1.102325</u> | 0.179788548 |
| Ltbr      | <u>0.95645</u>  | 0.173154303 |
| Mcl1      | <u>2.863425</u> | 0.814646302 |
| Nfkb1     | <u>1.107975</u> | 0.489015268 |
| Nme5      | <u>4.426225</u> | 3.745419341 |
| Nol3      | <u>3.628775</u> | 2.778984707 |
| Pak7      | <u>1.0131</u>   | 0.272984716 |
| Pim2      | <u>2.61035</u>  | 0.934315939 |
| Polb      | <u>0.7694</u>   | 0.283432276 |
| Prdx2     | <u>1.1874</u>   | 0.735440582 |
| Pycard    | <u>1.0074</u>   | 0.551907044 |
| Ripk1     | <u>1.18705</u>  | 0.200517188 |
| Rnf7      | <u>0.719925</u> | 0.351458891 |
| Sphk2     | <u>1.14865</u>  | 0.179195152 |
| Tnf       | <u>1.251525</u> | 0.134715095 |
| Tnfrsf10b | <u>1.799875</u> | 0.869962167 |
| Tnfrsf11b | <u>4.243225</u> | 3.336944855 |
| Tnfrsf1a  | <u>1.742525</u> | 0.186363682 |
| Cd40      | <u>2.39805</u>  | 1.378932704 |
| Tnfsf10   | <u>1.5235</u>   | 0.225387921 |
| Tnfsf12   | <u>1.425425</u> | 0.639290687 |
| Cd40lg    | <u>4.699525</u> | 1.683051603 |
| Cd70      | <u>1.277225</u> | 0.604678933 |
| Traf1     | <u>2.406175</u> | 1.521900559 |
| Traf2     | <u>1.62545</u>  | 0.353841522 |
| Traf3     | <u>1.312325</u> | 0.174634781 |
| Trp53     | <u>0.946375</u> | 0.216815513 |
| Trp53bp2  | <u>1.7321</u>   | 0.247718822 |
| Trp53inp1 | <u>3.729525</u> | 0.671401096 |
| Trp63     | <u>1.562025</u> | 0.940506848 |
| Trp73     | <u>1.168</u>    | 0.537565098 |
| Gusb      | <u>0.956425</u> | 0.049656287 |
| Gapdh     | <u>0.930825</u> | 0.237991747 |

## **SUPPLEMENTAL EXPERIMENTAL PROCEDURES**

### **Generation of Triple-Knockout Cyclin D1<sup>F/F</sup>D2<sup>-/-</sup>D3<sup>F/F</sup> Mice**

Cyclin D1<sup>F/F</sup> and D3<sup>F/F</sup> mice (Choi et al., 2012) were intercrossed with cyclin D2<sup>-/-</sup> mice (Sicinski et al., 1996) giving rise to cyclin D1<sup>F/F</sup>D2<sup>-/-</sup>D3<sup>F/F</sup> animals.

Genotyping and deletion analysis of floxed/deleted cyclin D1 and D3 alleles were performed with primers (see list of primer sequences below) D1F-5', D1F-3', D1- $\Delta$  for the cyclin D1 locus, and D3F-5', D3F-3', D3F- $\Delta$  for the cyclin D3 locus, by pre-denaturation of genomic DNA at 94°C 5 min, followed by 33 cycles of amplification: 94°C 30 sec, 60°C 30 sec, 72°C 30 sec and a final extension step at 72°C for 10 min. The PCR products were of the following sizes: D1<sup>wt</sup> = 180bp, D1<sup>F</sup> = 420bp, D1 <sup>$\Delta$</sup>  = 476bp; D3<sup>wt</sup> = 210bp, D3<sup>F</sup> = 500bp, D3 <sup>$\Delta$</sup>  = 450bp. Genotyping of cyclin D2<sup>-/-</sup> mice was performed as described (Sicinski et al., 1996). Wild-type mice (CD45.1) used in bone marrow transplantations were purchased from the Jackson Laboratory. All mice were housed under specific pathogen free conditions. Animal procedures were performed according to protocols approved by the Animal Care and Users Committee at DFCI.

### **Bone Marrow Reconstitution**

For non-competitive reconstitution assay, 5x10<sup>6</sup> bone marrow cells from CD45.2<sup>+</sup>, MxTKO or MxCntrl donor mice were intravenously injected into lethally irradiated CD45.1<sup>+</sup> recipients (1200 rads in two doses of 600 rads, 4 h apart). Recipient mice were maintained on antibiotic (Baytril) for 2 weeks. Six weeks after the transplantation, mice were treated five times with pl-pC (to delete D-cyclins in MxTKO cells), analyzed for the presence of CD45.2<sup>+</sup> peripheral blood cells and observed for survival.

### **Flow Cytometry and Hematologic Analyses**

Six to 10 weeks old Mx-Cre mice (TKO or control) were injected 1-3 times with pl-pC and peripheral blood analyses were performed on MASCOT Hemavet 850 Counter (CDC Technologies). Methylcellulose assays (M3434) were performed

according to manufacturer's specifications (Stemcell Technologies) and scored after 12 days of incubation at 37°C in 5% CO<sub>2</sub>. For lineage detection, freshly isolated bone marrow cells were first stained with a cocktail of biotinylated anti-mouse antibodies against Mac-1 $\alpha$  (CD11b), Gr-1 (Ly-6G/C), Ter119 (Ly-76), CD3, CD4, CD8a (Ly-2) and B220 (CD45R) (BD Biosciences) followed by detection with streptavidin conjugated to pacific orange (Invitrogen) or directly to individual fluorochrome-conjugated antibodies. SLAM-HSC (referred in the text as hematopoietic stem cells, HSC) or HSC-enriched progenitor population LKS (Lin-c-kit<sup>+</sup>Sca<sup>+</sup>, referred in the text as hematopoietic stem/progenitor cells, HSPC) were analyzed based on lineage markers and antibodies to the following: c-Kit, (BD Biosciences), CD48 and CD150 (BioLegend) and Sca-1 (Invitrogen) (Kiel et al., 2005). For congenic strain determination, anti-CD45.1-FITC and anti-CD45.2-PE antibodies (BD Biosciences) were used. For apoptosis analysis of HSC and HSPC we used AnnexinV-FITC and 7-AAD (BD Biosciences). All sorting and data collection was performed on LSRII, Facs Aria, Fortessa and Facscan (BD Biosciences).

Cell cycle analysis and quiescence (G<sub>0</sub>) evaluation of HSPC was performed as previously described (Wilson et al., 2008). Briefly, bone marrow cells were stained for HSPC markers as described above. Subsequently, cells were fixed and permeabilized using Cytofix/Cytoperm kit (from BD) and stained with 4',6-diamidino-2-phenylindole (DAPI) and a FITC conjugated anti-Ki-67 antibody (BD Bioscience). G<sub>0</sub> cells were gated based on their DNA content (2N) and low/negative Ki-67 expression. This population was previously shown to correspond to a rarely dividing population as demonstrated by H2B-GFP staining (Wilson et al., 2008; Foudi et al., 2009). For the detection of active caspase 3 in G<sub>0</sub> HSPC, a PE-conjugated anti-cleaved caspase 3 antibody was used (BD Biosciences) in combination with the Ki-67 and DAPI staining in fixed and permeabilized HSPC.

### **Apoptosis Array and Gene Expression Analysis**

For the apoptosis pathway array, bone marrows were harvested 48 h after pl-pC injection from either MxTKO or MxCntrl mice (n=4 biological replicates per group). Total RNA was prepared using Qiagen RNeasy kit and 2  $\mu$ g of RNA were used to prepare cDNA using SABiosciences-Qiagen first strand kit. The cDNA was then analyzed using RT<sup>2</sup> Profiler™ Apoptosis PCR SArray (Qiagen) run on 384-well format Applied Biosystems, (ABI) 7900HT machine. Data was analyzed using PCR Array Data Analysis web-based portal (Qiagen). For other analyses of bone marrow, cDNA was synthesized using Applied Biosciences Two-step RT kit/2X SYBRgreen master mix and run on ABI 7300 PCR machine. To quantify transcripts in hematopoietic stem cells or hematopoietic stem/progenitor cells, HSC or HSPC were stained and flow sorted as described above from MxTKO and MxCntrl mice. For detection of cyclin D1, D2 and D3 transcripts, HSC were flow-sorted from wild-type C57BL/6 mice (from the Jackson Laboratory) as above. cDNA template from these cells was amplified using Nugen Amplification kit. The  $\Delta\Delta$ -Ct method was applied to determine relative mRNA expression using GAPDH mRNA levels for normalizing cDNA levels. Quantitative PCR primer sequences are provided below.

### **Promoter Constructs and Reporter Gene Assays**

The FasL promoter construct was previously described (Nakamura et al., 2000); Fas promoter was cloned as described (Anders et al., 2011). To remove the E2F1 binding fragment, we deleted DNA sequences between nt – 1617-1707 (relative to transcription start site) from the human Fas promoter (corresponding to nt – 1693-1793 in the mouse promoter). E2F1 non-DNA binding and transactivation-deficient mutant E2F1(132)(1-374) was as described (Hsieh et al., 1997). In Figures 6H and S5G, U2OS cells were transfected with Lipofectamine 2000 (Invitrogen) in 24-well plates. Cells were lysed 30 h post-transfection and reporter assays performed with the Dual Luciferase Reporter Assay System (Promega). In Figure S5G, luciferase activity was normalized to percentage of GFP expressing cells.

## Chromatin Immunoprecipitation (ChIP)

HSPC were sorted from wild-type C57BL/6 mice (from the Jackson Laboratory) as described above, and ~50,000 cells were used per experiment, n=3 biological replicates. ChIP analysis was performed using MAGnify™ Chromatin Immunoprecipitation System (Life Technologies) according to manufacturers specifications. E2F1 antibodies SC-193x (Santa Cruz) and 05-379 (Millipore) were used for E2F1 ChIP analysis. Enrichment of genomic regions bound by E2F1 across the Fas promoter versus non-bound sequences (negative region) was quantified by qPCR. Sequences of primers used for control ChIP (p107, cyclin A2, E2F1) have been previously described (Rayman et al., 2002).

## Mitochondrial Membrane Potential Assays

For mitochondrial membrane potential assays, MxTKO and MxCntrl mice were injected with a 1-3 doses of pl-pC. Bone marrow cells were harvested after 2, 4 and 6 days and stained with cationic dye, JC-1, using Mitoprobe JC-1 Assay Kit (Life Technologies) and analyzed by FACS. As a positive control, MxCntrl bone marrow cells were treated with 25-100  $\mu$ M carbonyl cyanide 3-chlorophenylhydrazone (CCPP) for 10 min and analyzed in parallel.

| Gene/Primer Name | Primer sequences                      |
|------------------|---------------------------------------|
| D1F-5'           | 5' - GAG TTT TCC GGG TGC GTT - 3'     |
| D1F-3'           | 5' - CTG TGG TGT CGC TGA CA - 3'      |
| D1- $\Delta$     | 5' - GGC AGT AGC AAG ATC TGT TA- 3'   |
| D3F-5'           | 5' - CTG CGT TCT GTC CCT TTC CTT - 3' |
| D3F-3'           | 5' - CGC GAT AGA CAC AGG AAC CA - 3'  |
| D3- $\Delta$     | 5' - CCA GAC TGG AGC CAG AGA TAA - 3' |
| D1_Fwd           | 5'-TGT TAC TTG TAG CGG CCT GTT G-3'   |
| D1_Rev           | 5'-CCG GAG ACT CAG AGC AAA TCC-3'     |
| D2_Fwd           | 5'-CAC GAC TTC ATT GAG CAC ATC CT-3'  |
| D2_Rev           | 5'-GCG GAT CAG GGA CAG CTT CT-3'      |
| D3_Fwd           | 5'-TGC CAA AAC GCC CCA GTA C-3'       |
| D3_Rev           | 5'-CGG GAT GCC CGA AGG A-3'           |
| Bax.1_Fwd        | 5'-GATCAGCTCGGGCACTTTAG- 3'           |

|                           |                                                          |
|---------------------------|----------------------------------------------------------|
| Bax.1_Rev                 | 5'-TTGCTGATGGCAACTTCAAC- 3'                              |
| Bax.2_Fwd                 | 5'-GATGGTTCTGATCAGCTCGG- 3'                              |
| Bax.2_Rev                 | 5'-TGTTTGCTGATGGCAACTTC - 3'                             |
| Noxa.1_Fwd                | 5'-ACTTTGTCTCCAATCCTCCG - 3'                             |
| Noxa.1_Rev                | 5'-GAAGTCGCAAAAGAGCAGGA- 3'                              |
| Noxa.2_Fwd                | 5'-TTGAGCACACTCGTCCTTCA- 3'                              |
| Noxa.2_Rev                | 5'-GGAGTGCACCGGACATAACT- 3'                              |
| Puma.1_Fwd                | 5'-TGTCGATGCTGCTCTTCTTG- 3'                              |
| Puma.1_Rev                | 5'-GTGTGGAGGAGGAGGAGTGG - 3'                             |
| Puma.2_Fwd                | 5'-GGTGTGATGCTGCTCTTCT- 3'                               |
| Puma.2_Rev                | 5'-GTGTGGAGGAGGAGGAGTGG- 3'                              |
| CD40L_Fwd                 | 5'-AGC TAA AGA GAT GCA ACA AAG GAG-3'                    |
| CD40L_Rev                 | 5'-GAC AAG GTC TTC AAA TTG CCT TCT CA-3'                 |
| E2F1_Fwd                  | 5'-GGG AGA AGT CAC GCT ATG AAA CCT-3'                    |
| E2F1_Rev                  | 5'-ATG TCA TAG ATG CGC CGT TTC TGC-3'                    |
| E2F2_Fwd                  | 5'-TTC ATT TATC CTG AGC GAG TCG GA-3'                    |
| E2F2_Rev                  | 5'-TTT GGA CTT CTT GCG GAT GAG CTG -3'                   |
| E2F3_Fwd                  | 5'-GCT GCA GCC TCC ATG GAC AAA -3'                       |
| E2F3_Rev                  | 5'-AAG GGT TCG TAG TGA GGA TCT GGA-3'                    |
| Fas_Fwd                   | 5'-AGA GGT GGA AAC AAA CTG CAC CCT-3'                    |
| Fas_Rev                   | 5'-ACA CAG TGT TCA CAG CCA GGA GAA-3                     |
| Fas deletion 90 Sense     | 5'-TAC CCA ACC CTT TGA CAT TAT ATG TCT CCC CAC AAA GC-3' |
| Fas deletion 90 Antisense | 5'-GCT TTG TGG GGA GAC ATA TAA TGT CAA AGG GTT GGG TA-3' |
| FasL_Fwd                  | 5'-ATC CCT CTG GAA TGG GAA GACACA -3'                    |
| FasL_Rev                  | 5'-AGT TTC GTT GAT CAC AAG GCC ACC-3'                    |

| <b>Chip primers</b> |                                  |
|---------------------|----------------------------------|
| Cycin A_Fwd         | 5'-TGTAAGATTCCCGTCGGGCCTTC-3'    |
| Cycin A_Rev         | 5'-AGGCGGGAGGAGCGTAGAGCC-3'      |
| E2F1_Fwd            | 5'-ATCGGAGC CTCCGTCGTCACA-3'     |
| E2F1_Rev            | 5'-AGGCCGCGGCGAGGGCTCGAT-3'      |
| FPR1_Fwd            | 5'-CTGTAATGGGATCCGACACC-3'       |
| FPR1_Rev            | 5'-TCCTTGACTATCTGATAAGAGTGTTG-3' |
| FPR2_Fwd            | 5'-CAGTCTCTGTGAGGTCATGTG-3'      |
| FPR2_Rev            | 5'-AAGAGGAGGAGGCAGGAA-3'         |
| FPR3_Fwd            | 5'-GCCACTATATGCACTAGCTCATC-3'    |
| FPR3_Rev            | 5'-TCATCCCTACATGCCAACATC-3'      |
| Nes3_Fwd            | 5'-CCAAGCAGCAAGAGACGTAA-3'       |
| Nes3_Rev            | 5'-GTTGTCAGCGTCCTGAAGAG-3'       |
| p107_Fwd            | 5'-TTAGAGTCCGAGGTCCATCTTCT-3'    |
| p107_Rev            | 5'-GGGCTCGTCTCGAACATATCC-3'      |

## **SUPPLEMENTAL REFERENCES**

Cao, A. R., Rabinovich, R., Xu, M., Xu, X., Jin, V. X., and Farnham, P. J. (2011) Genome-wide analysis of transcription factor E2F1 mutant proteins reveals that N- and C-terminal protein interaction domains do not participate in targeting E2F1 to the human genome. *J Biol Chem* 286, 11985-96.

Foudi, A., Hochedlinger, K., van Buren, D., Schindler, J. W., Jaenisch, R., Carey, V., and Hock, H. (2009) Analysis of histone 2B-GFP retention reveals slowly cycling hematopoietic stem cells. *Nat Biotechnol* 27, 84-90.

Kiel, M. J., Yilmaz, O. H., Iswashita, T., Yilmaz, O. H., Terhorst, C., and Morrison, S. J. (2005) SLAM family receptors distinguish hematopoietic stem and progenitor cells and reveal endothelial niches for stem cells. *Cell* 121, 1109-1121.

Rayman, J. B., Takahashi, Y., Indjeian, V. B., Dannenberg, J-H., Catchpole, S., Watson, R. J., te Riele, H., and Dynlacht, B. D. (2002) E2F mediates cell cycle-dependent transcriptional repression in vivo by recruitment of an HDAC1/mSin3B corepressor complex. *Genes Dev* 16, 933–947.
